# Supplementary material
Source: publisher site journal article supplement (https://www.dovepress.com/article/390557)
Supplement: Supplementary file 1 [file get_supplementary_file.php]

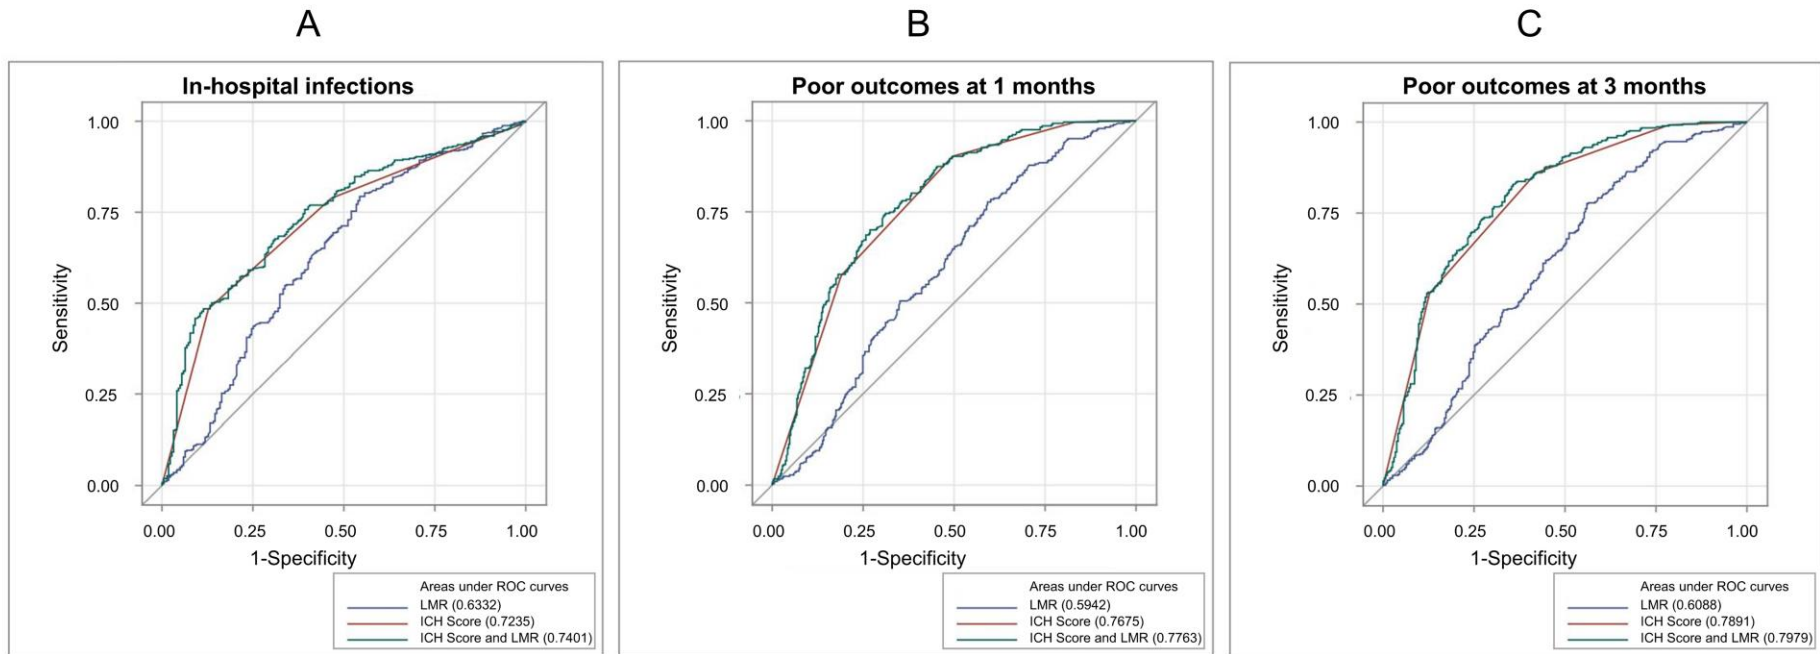

**Supplementary figure 1.** ROC curves for comparing predictive ability of combined LMR and ICH Score, and LMR or ICH Score alone. A. In-hospital infections. B. Poor outcomes at 1 month. C. Poor outcomes at 3 months. *ROC*, receiver operator characteristic; *LMR*, lymphocyte to monocyte ratio; *ICH*, intracerebral hemorrhage.
